# Supplementary material
Source: PubMed Central journal article supplement (PMC6138581)
Supplement: NIHMS951404-supplement-Supp_info2.pdf [file NIHMS951404-supplement-Supp_info2.pdf]

# Supplementary Figure 1

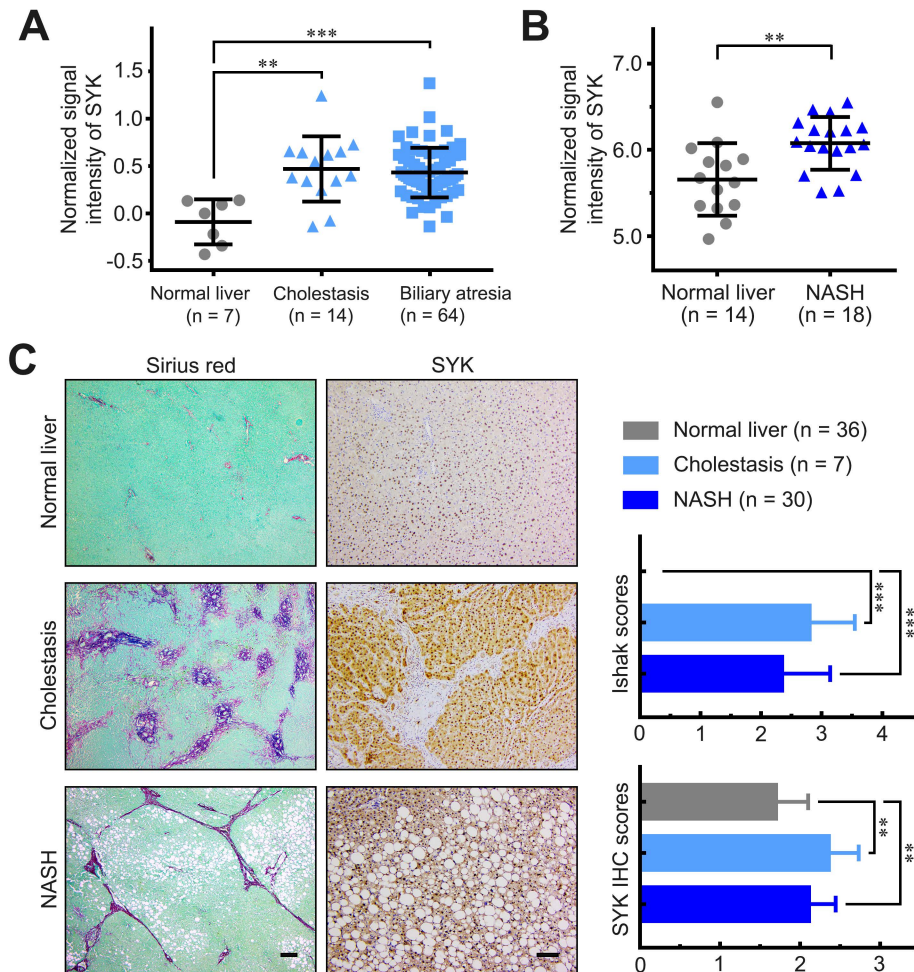

# Supplementary Figure 2

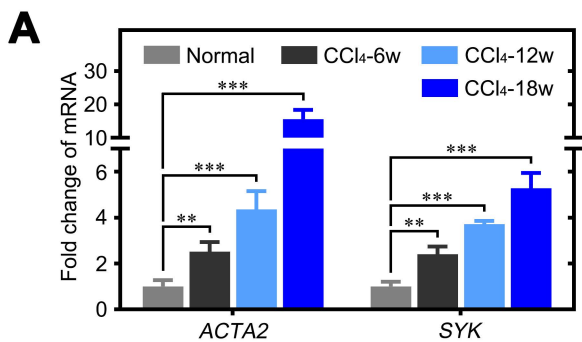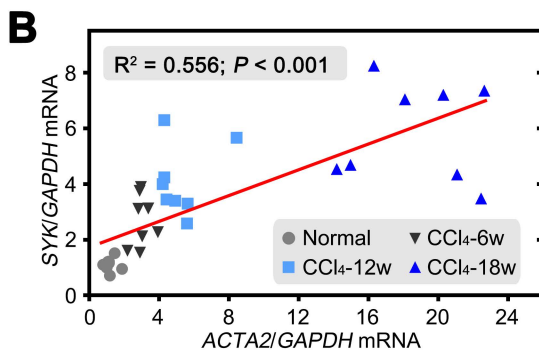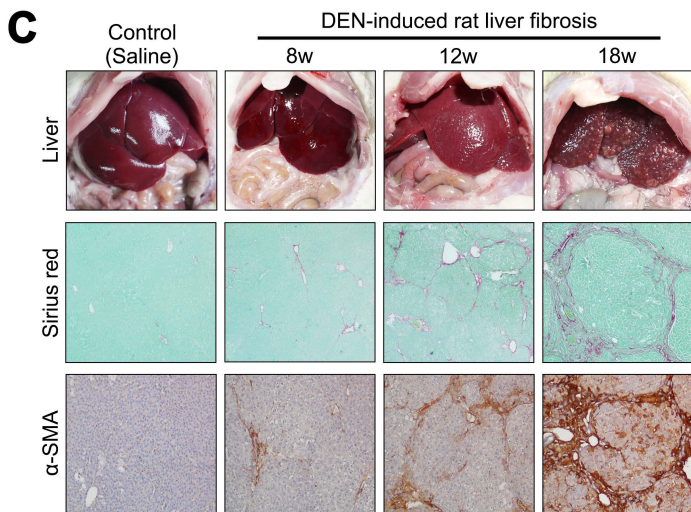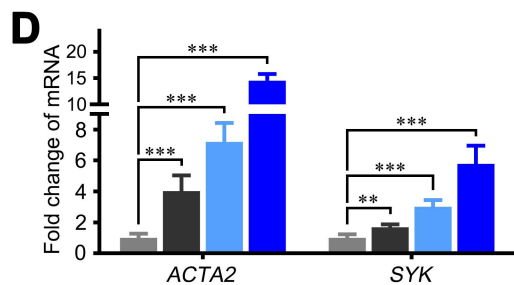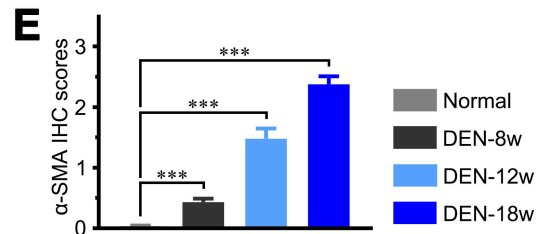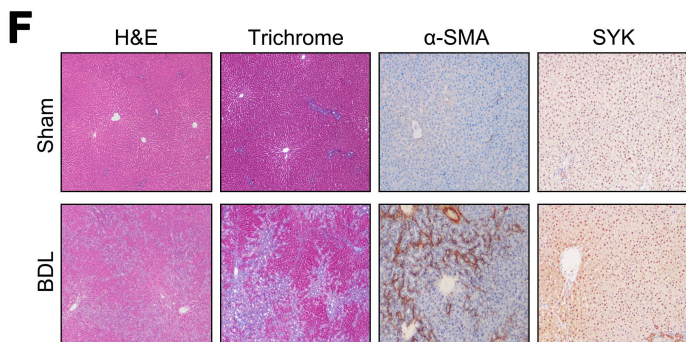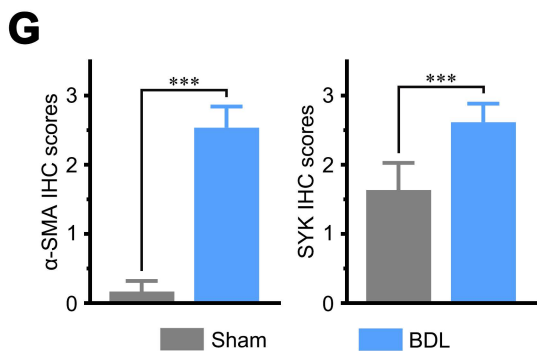

# Supplementary Figure 3

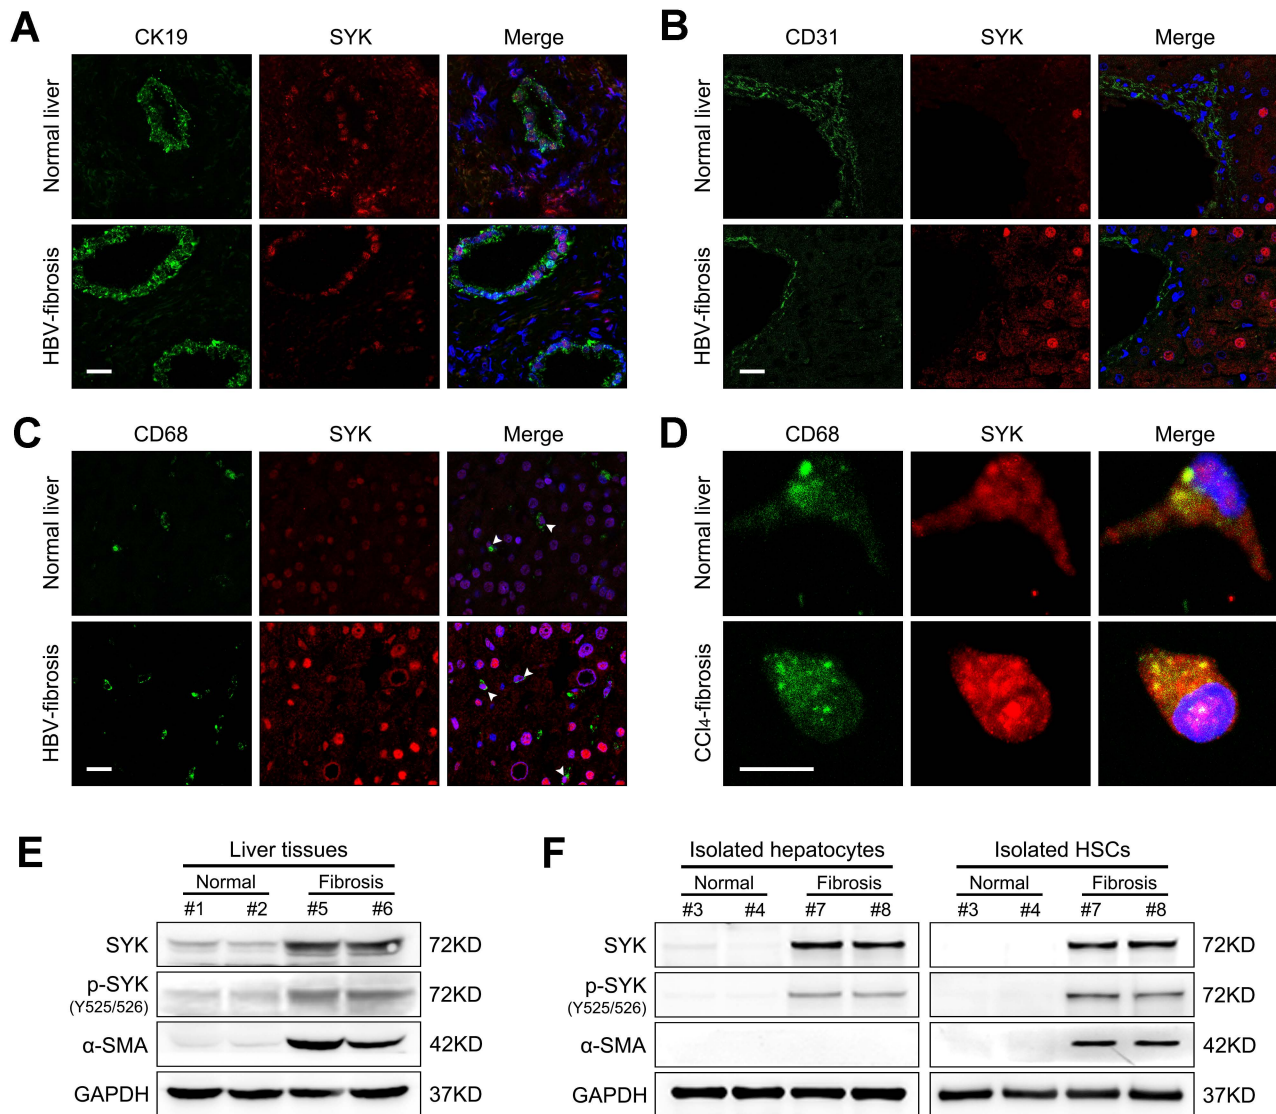

# Supplementary Figure 4

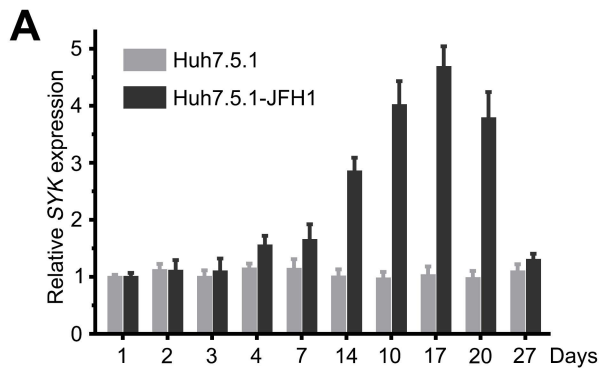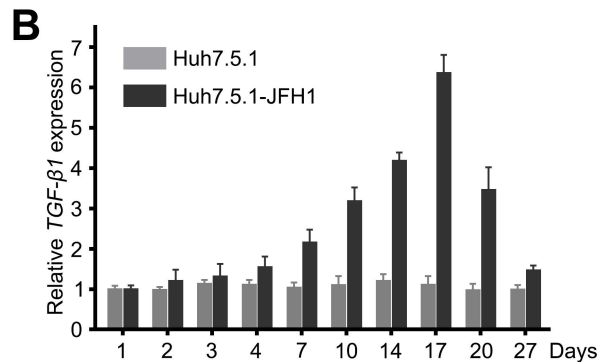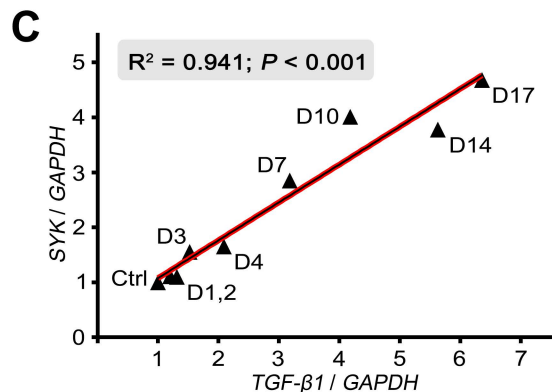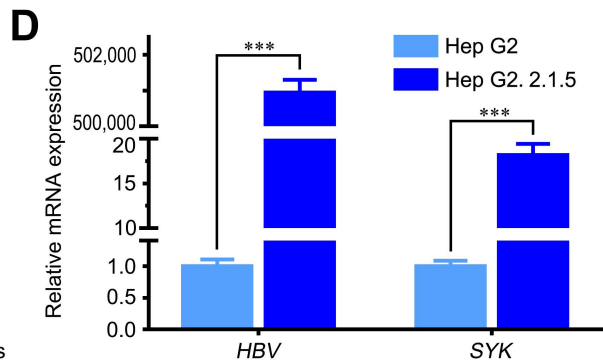

# Supplementary Figure 5

## A

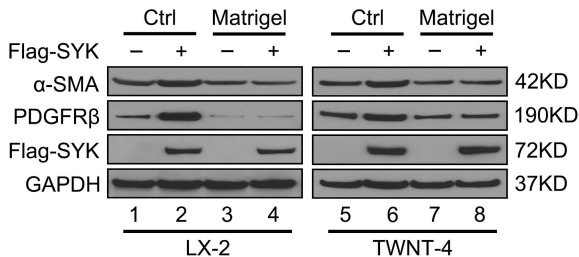

## B

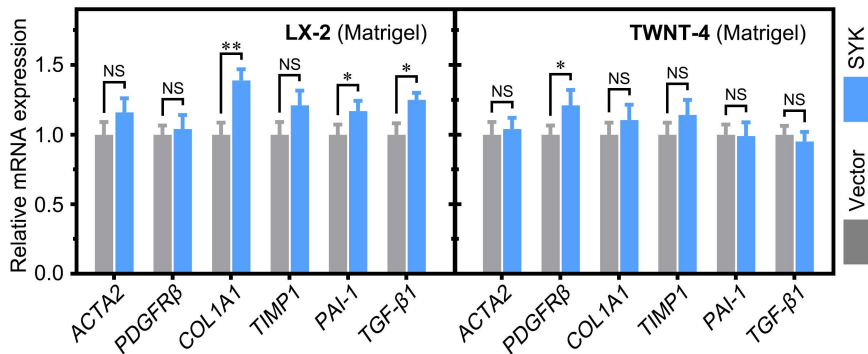

# Supplementary Figure 6

## A

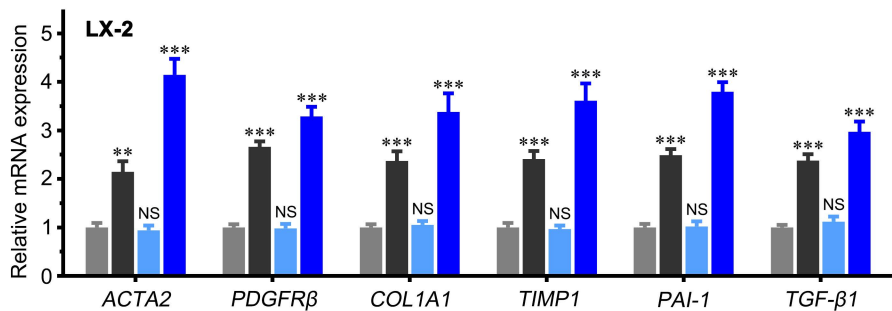

## B

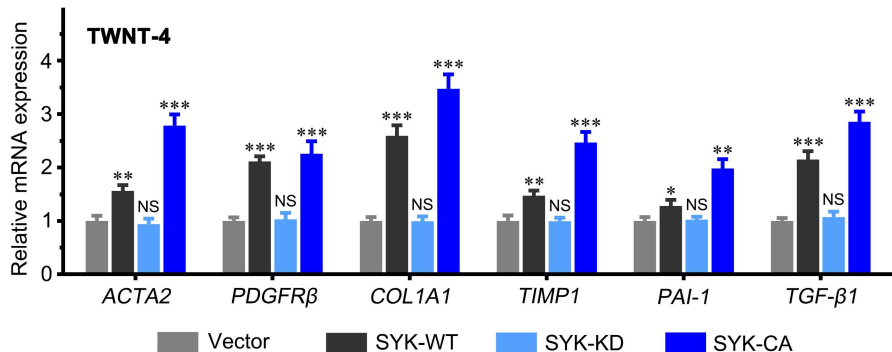

# Supplementary Figure 7

**A**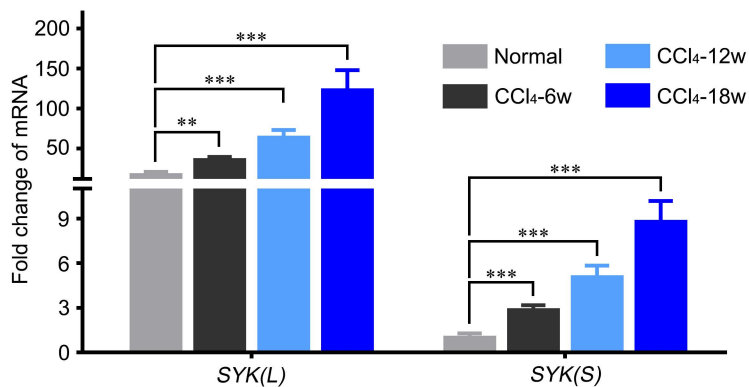**B**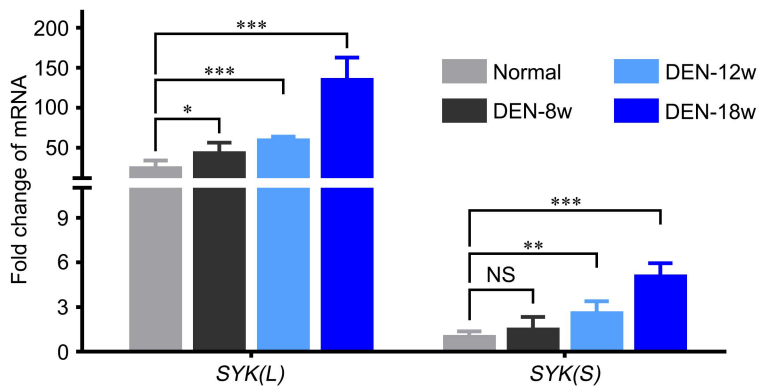

# Supplementary Figure 8

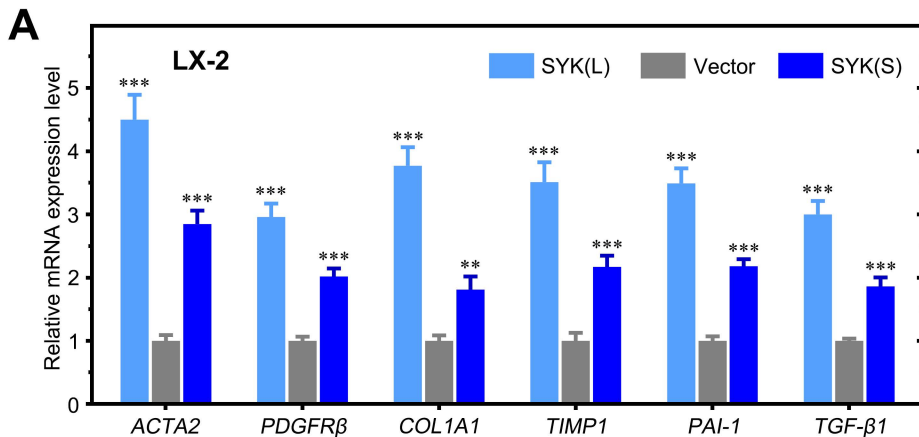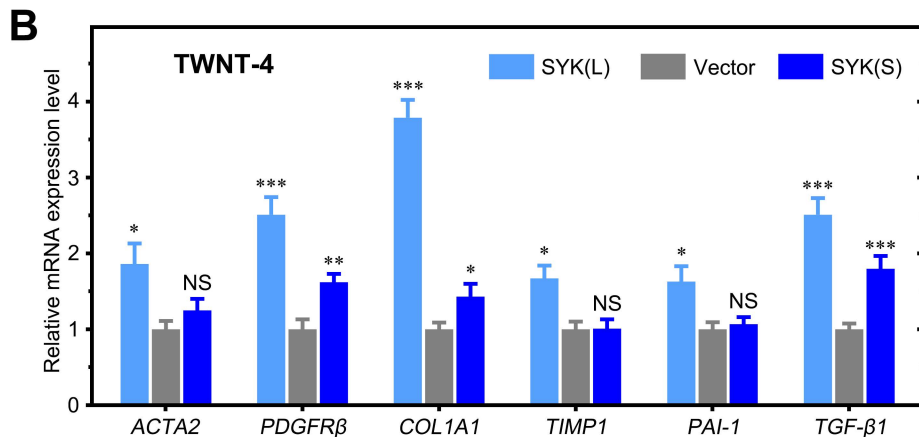



# Supplementary Figure 9

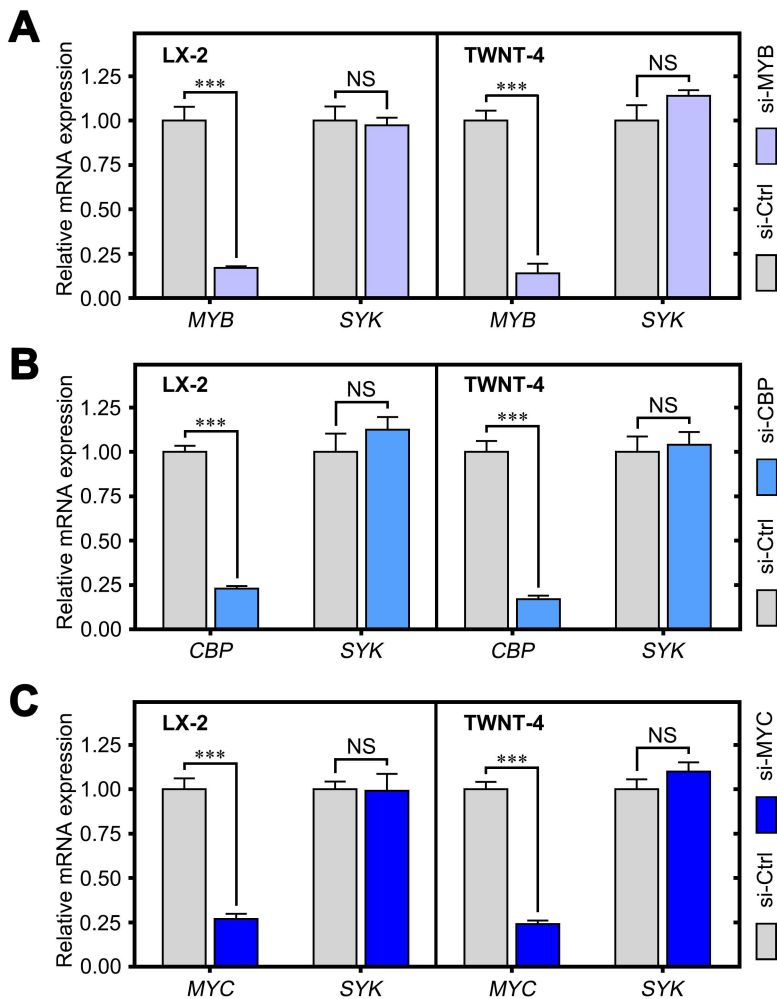

# Supplementary Figure 10

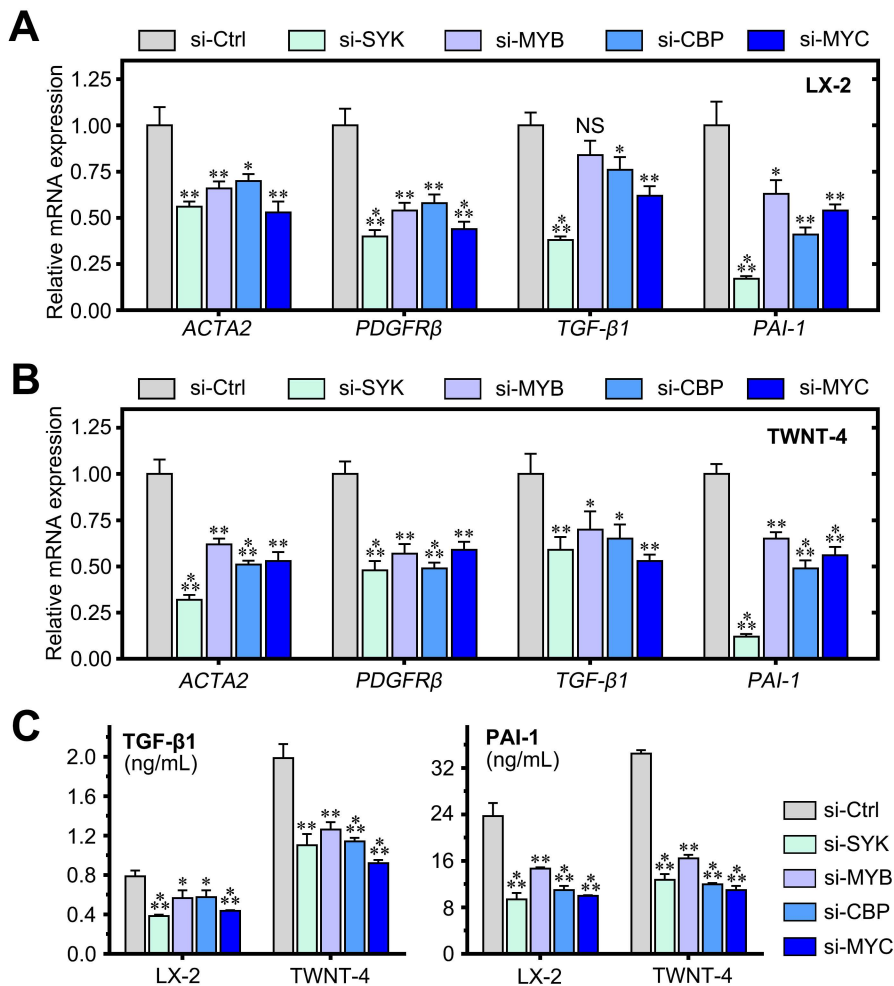

# Supplementary Figure 11

## A

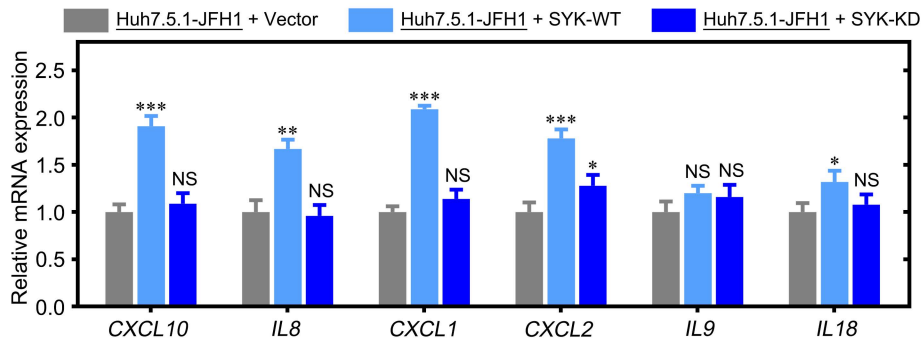

## B

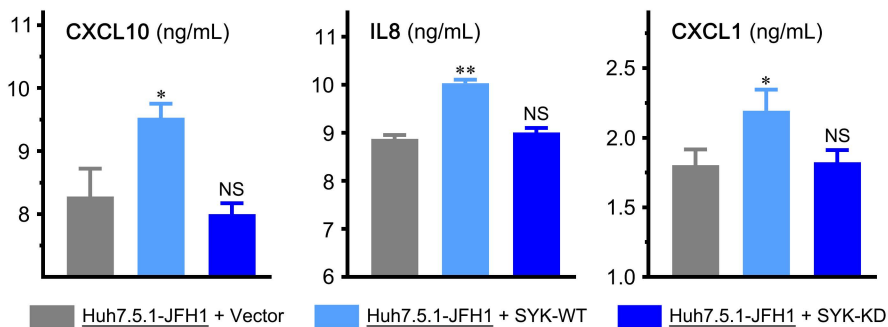

# Supplementary Figure 12

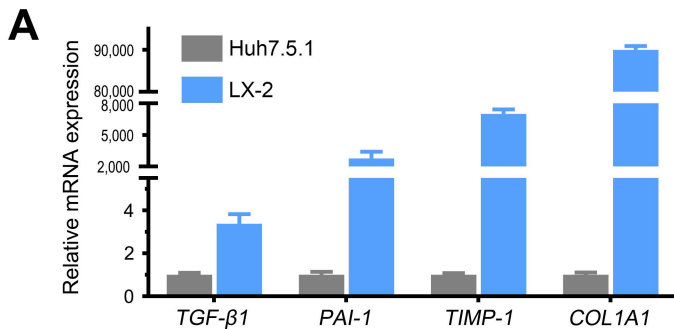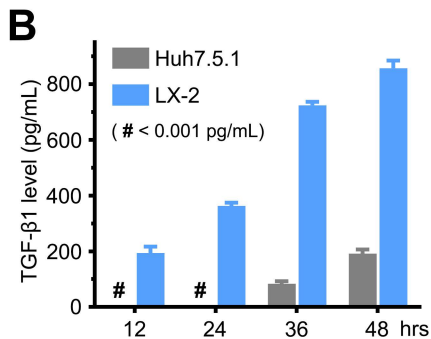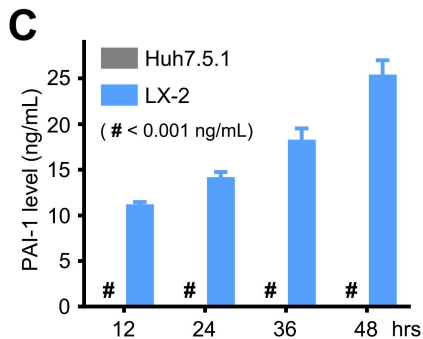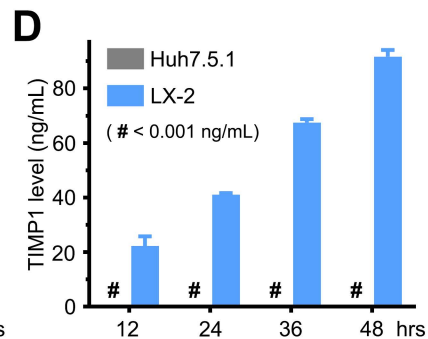

# Supplementary Figure 13

## A

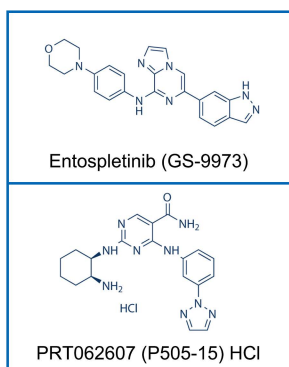

## B

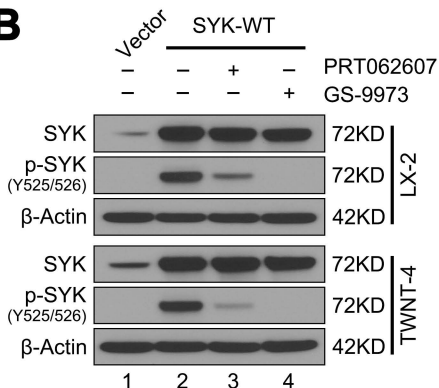

## C

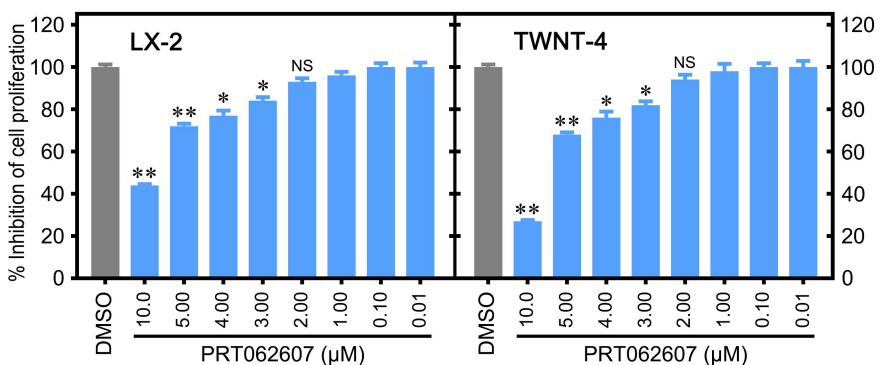

## D

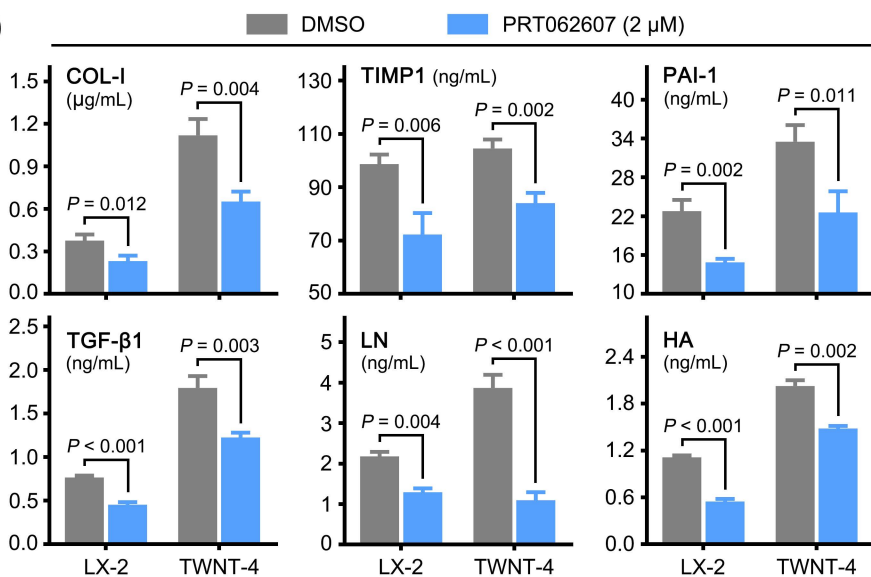

# Supplementary Figure 14

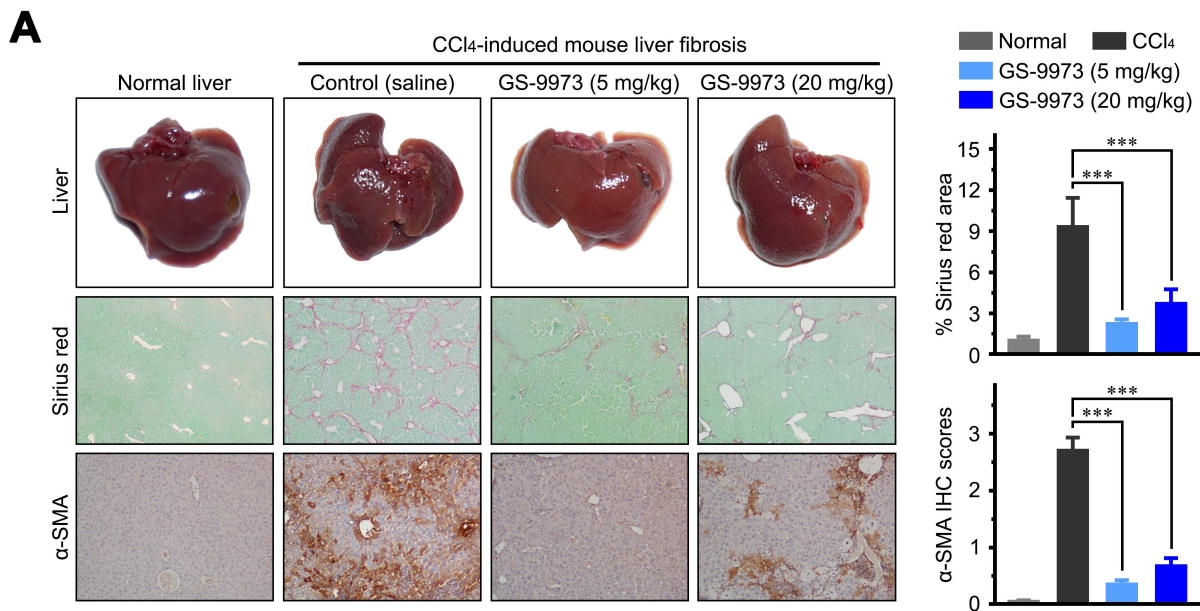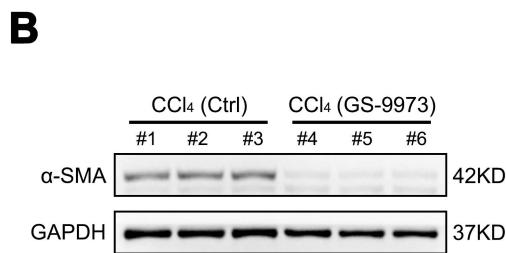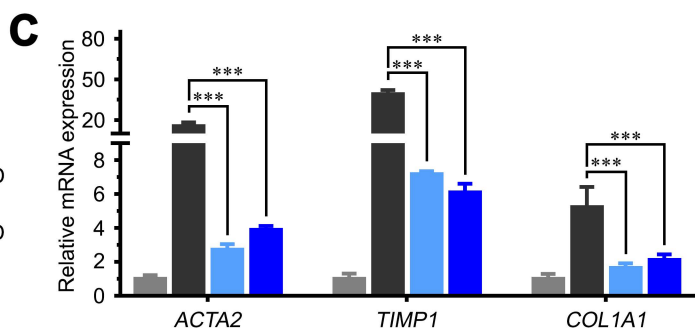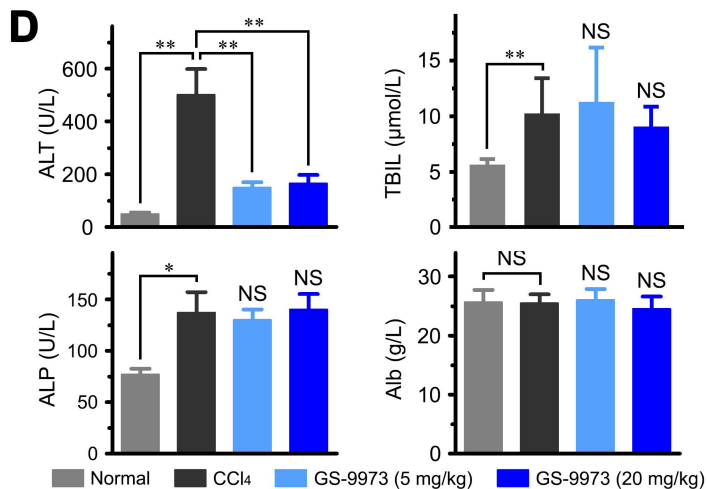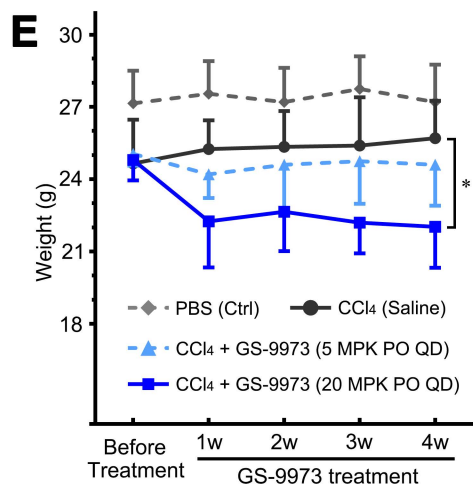

# Supplementary Figure 15

## A

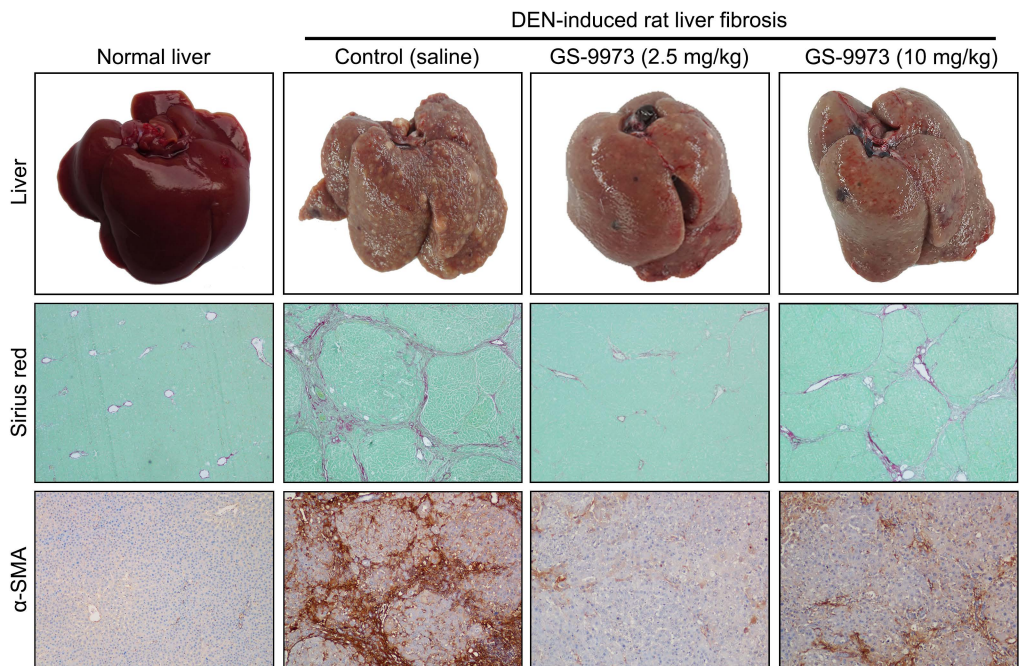

## B

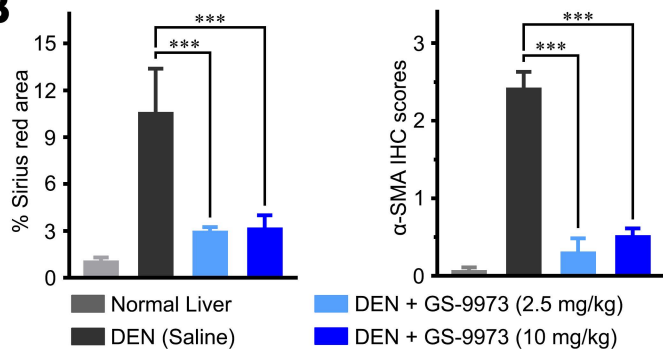

## C

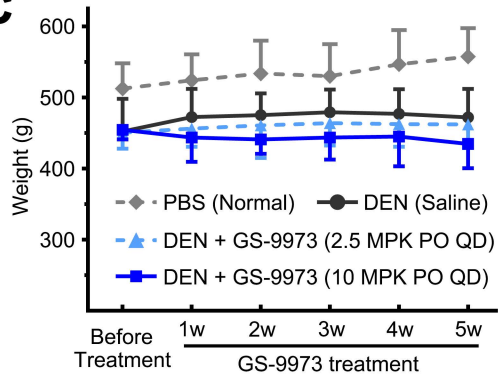

## D

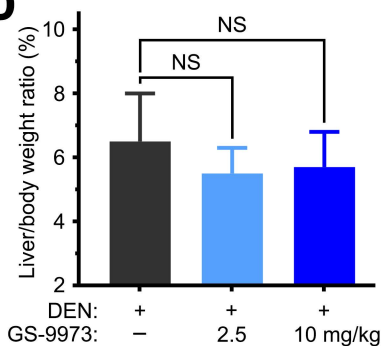

## E

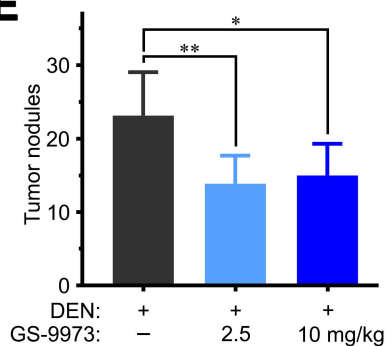

## F

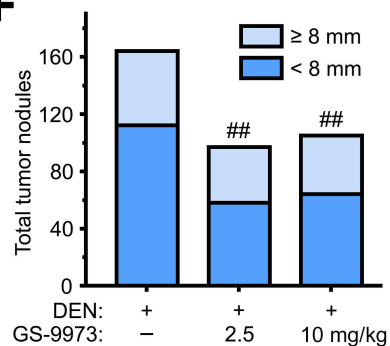

# Supplementary Figure 16

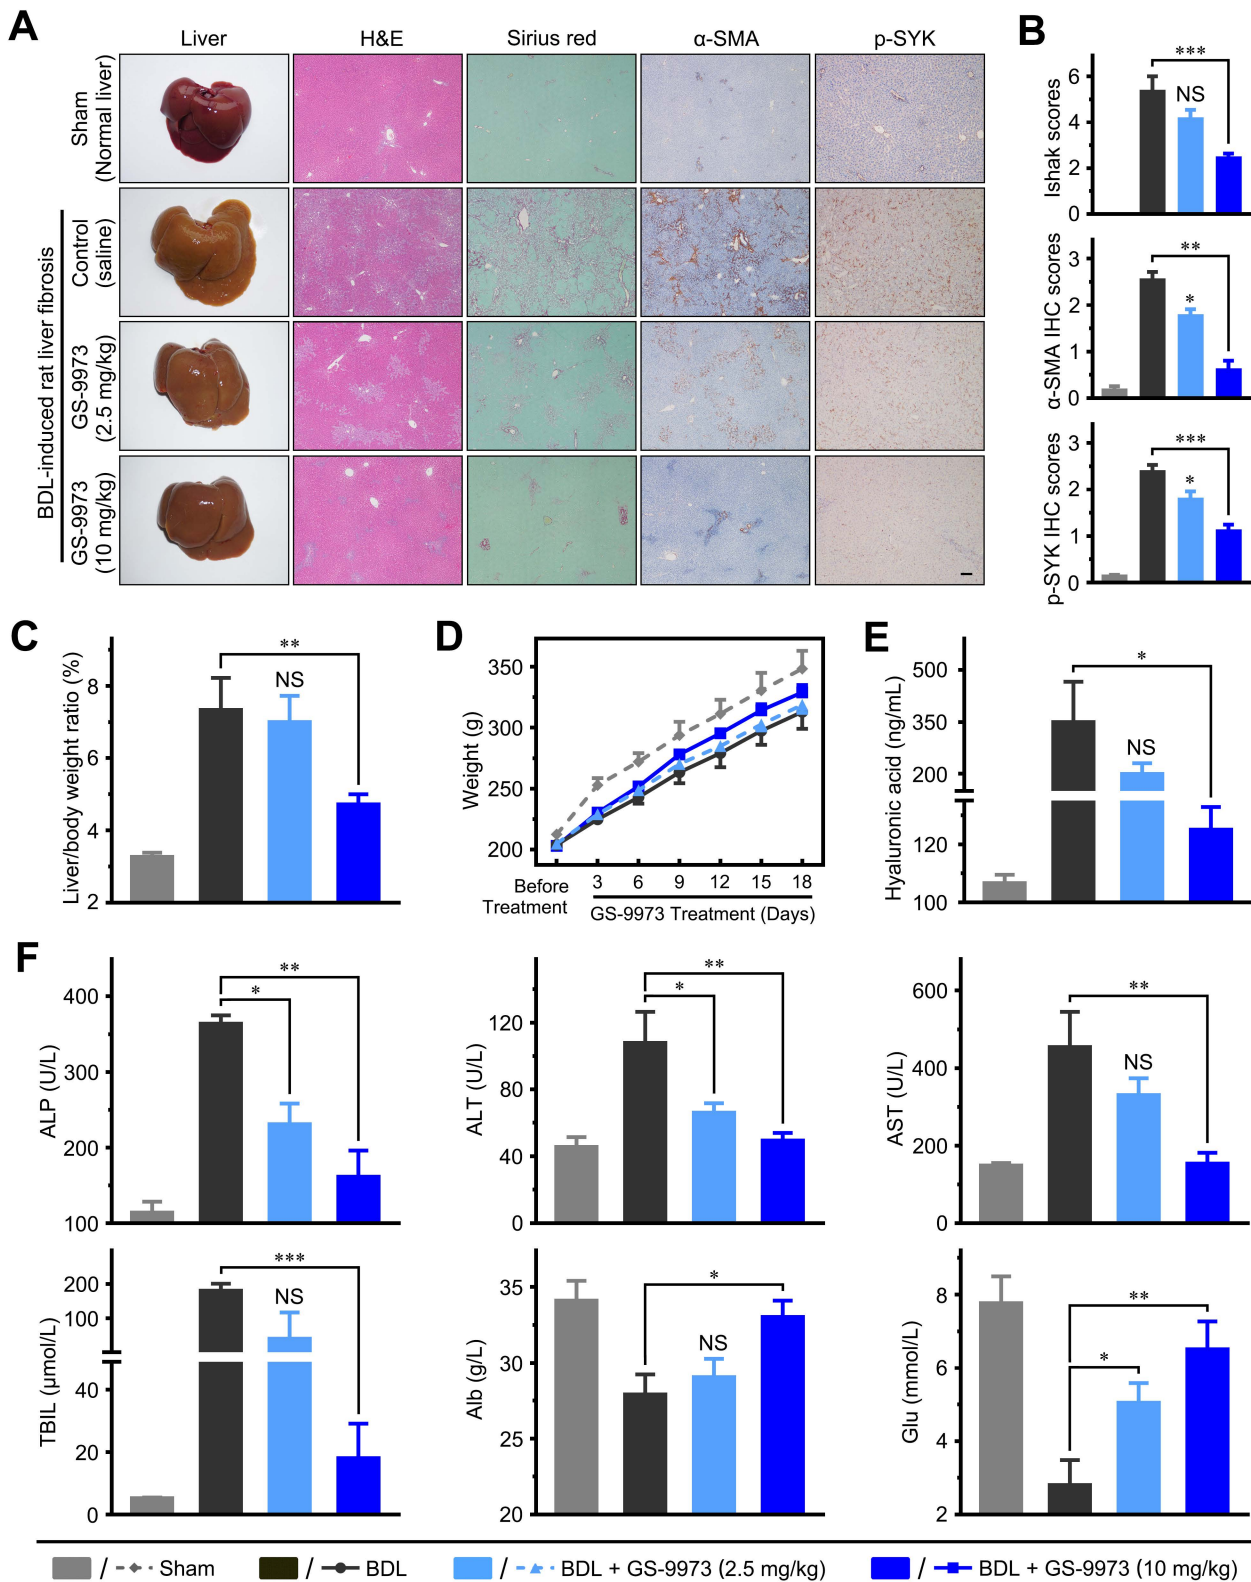



# Supplementary Figure 17

## A

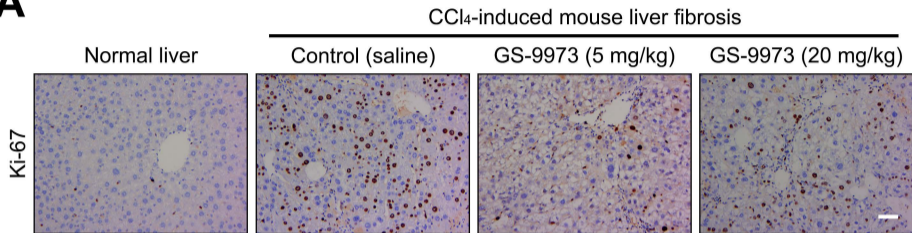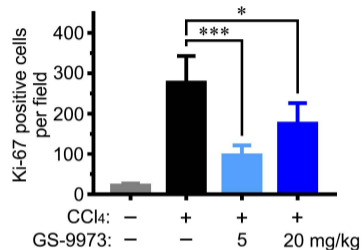

## B

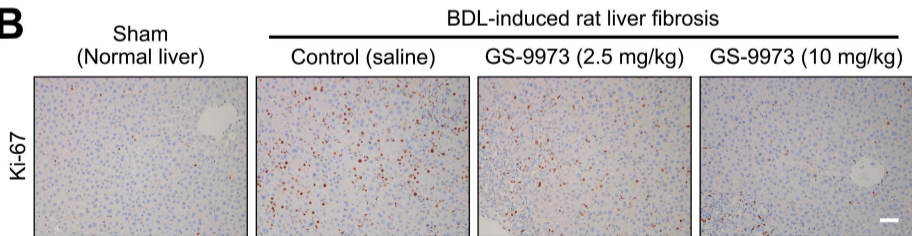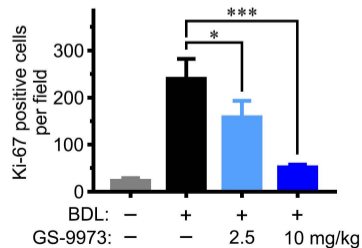

**Supplementary Table 1.** PCR array results showing 84 transcription factors regulated by SYK siRNA in LX-2 cells.

| <b>GenBank</b> | <b>Gene Symbol</b> | <b>Description</b>                                                                      | <b>Fold Change</b> | <b>P-value</b> |
|----------------|--------------------|-----------------------------------------------------------------------------------------|--------------------|----------------|
| NM_005593      | <b>MYF5</b>        | Myogenic factor 5                                                                       | 2.1650             | 0.0242         |
| NM_003220      | <b>TFAP2A</b>      | Transcription factor AP-2 alpha (activating enhancer binding protein 2 alpha)           | 2.2367             | 0.0094         |
| NM_000044      | <b>AR</b>          | Androgen receptor                                                                       | -2.0718            | 0.0295         |
| NM_001668      | <b>ARNT</b>        | Aryl hydrocarbon receptor nuclear translocator                                          | -2.1700            | 0.0025         |
| NM_001880      | <b>ATF2</b>        | Activating transcription factor 2                                                       | -2.6010            | 0.0075         |
| NM_005194      | <b>CEBPB</b>       | CCAAT/enhancer binding protein (C/EBP), beta                                            | -2.6496            | 0.0167         |
| NM_001806      | <b>CEBPG</b>       | CCAAT/enhancer binding protein (C/EBP), gamma                                           | -3.3828            | 0.0000         |
| NM_004380      | <b>CREBBP</b>      | CREB binding protein                                                                    | -2.9252            | 0.0101         |
| NM_005225      | <b>E2F1</b>        | E2F transcription factor 1                                                              | -2.4270            | 0.0227         |
| NM_001964      | <b>EGR1</b>        | Early growth response 1                                                                 | -4.1974            | 0.0284         |
| NM_005229      | <b>ELK1</b>        | ELK1, member of ETS oncogene family                                                     | -3.2634            | 0.0042         |
| NM_005252      | <b>FOS</b>         | FBJ murine osteosarcoma viral oncogene homolog                                          | -3.2571            | 0.0361         |
| NM_005249      | <b>FOXG1</b>       | Forkhead box G1                                                                         | -2.0529            | 0.0011         |
| NM_001514      | <b>GTF2B</b>       | General transcription factor IIB                                                        | -2.8202            | 0.0017         |
| NM_021973      | <b>HAND2</b>       | Heart and neural crest derivatives expressed 2                                          | -2.4831            | 0.0188         |
| NM_001530      | <b>HIF1A</b>       | Hypoxia inducible factor 1, alpha subunit (basic helix-loop-helix transcription factor) | -2.3695            | 0.0073         |
| NM_019102      | <b>HOXA5</b>       | Homeobox A5                                                                             | -2.6289            | 0.0333         |
| NM_005526      | <b>HSF1</b>        | Heat shock transcription factor 1                                                       | -3.4659            | 0.0226         |
| NM_002165      | <b>ID1</b>         | Inhibitor of DNA binding 1, dominant negative helix-loop-helix protein                  | -3.1447            | 0.0010         |
| NM_002198      | <b>IRF1</b>        | Interferon regulatory factor 1                                                          | -3.4654            | 0.0100         |
| NM_002228      | <b>JUN</b>         | Jun proto-oncogene                                                                      | -2.8982            | 0.0039         |
| NM_002229      | <b>JUNB</b>        | Jun B proto-oncogene                                                                    | -3.4628            | 0.0028         |
| NM_005587      | <b>MEF2A</b>       | Myocyte enhancer factor 2A                                                              | -2.1155            | 0.0294         |
| NM_002397      | <b>MEF2C</b>       | Myocyte enhancer factor 2C                                                              | -3.2452            | 0.0368         |
| NM_005375      | <b>MYB</b>         | V-myb myeloblastosis viral oncogene homolog (avian)                                     | -3.0227            | 0.0013         |
| NM_002467      | <b>MYC</b>         | V-myc myelocytomatosis viral oncogene homolog (avian)                                   | -2.8924            | 0.0039         |
| NM_012340      | <b>NFATC2</b>      | Nuclear factor of activated T-cells, cytoplasmic, calcineurin-dependent 2               | -2.1385            | 0.0406         |
| NM_004554      | <b>NFATC4</b>      | Nuclear factor of activated T-cells, cytoplasmic, calcineurin-dependent 4               | -2.8068            | 0.0043         |
| NM_003998      | <b>NFKB1</b>       | Nuclear factor of kappa light polypeptide gene enhancer in B-cells 1                    | -3.0583            | 0.0019         |
| NM_006166      | <b>NFYB</b>        | Nuclear transcription factor Y, beta                                                    | -2.2845            | 0.0034         |

|           |               |                                                                                     |         |        |
|-----------|---------------|-------------------------------------------------------------------------------------|---------|--------|
| NM_000321 | <b>RB1</b>    | Retinoblastoma 1                                                                    | -2.4225 | 0.0026 |
| NM_006509 | <b>RELB</b>   | V-rel reticuloendotheliosis viral oncogene homolog B                                | -3.1257 | 0.0269 |
| NM_005900 | <b>SMAD1</b>  | SMAD family member 1                                                                | -2.4620 | 0.0038 |
| NM_005903 | <b>SMAD5</b>  | SMAD family member 5                                                                | -3.2173 | 0.0022 |
| NM_005905 | <b>SMAD9</b>  | SMAD family member 9                                                                | -3.3038 | 0.0232 |
| NM_138473 | <b>SP1</b>    | Sp1 transcription factor                                                            | -2.2899 | 0.0004 |
| NM_007315 | <b>STAT1</b>  | Signal transducer and activator of transcription 1, 91kDa                           | -2.1440 | 0.0036 |
| NM_005419 | <b>STAT2</b>  | Signal transducer and activator of transcription 2, 113kDa                          | -2.7573 | 0.0131 |
| NM_003150 | <b>STAT3</b>  | Signal transducer and activator of transcription 3<br>(acute-phase response factor) | -2.3292 | 0.0086 |
| NM_003153 | <b>STAT6</b>  | Signal transducer and activator of transcription 6,<br>interleukin-4 induced        | -2.8918 | 0.0244 |
| NM_030756 | <b>TCF7L2</b> | Transcription factor 7-like 2 (T-cell specific, HMG-box)                            | -2.3670 | 0.0010 |
| NM_000546 | <b>TP53</b>   | Tumor protein p53                                                                   | -2.2292 | 0.0010 |
| NM_003403 | <b>YY1</b>    | YY1 transcription factor                                                            | -2.1618 | 0.0007 |
| NM_005171 | ATF1          | Activating transcription factor 1                                                   | -1.9148 | 0.0001 |
| NM_001674 | ATF3          | Activating transcription factor 3                                                   | -1.4829 | 0.1651 |
| NM_001675 | ATF4          | Activating transcription factor 4 (tax-responsive enhancer<br>element B67)          | 1.2588  | 0.0676 |
| NM_004364 | CEBPA         | CCAAT/enhancer binding protein (C/EBP), alpha                                       | 1.1676  | 0.6424 |
| NM_004379 | CREB1         | CAMP responsive element binding protein 1                                           | -1.6783 | 0.0041 |
| NM_001904 | CTNNB1        | Catenin (cadherin-associated protein), beta 1, 88kDa                                | -1.6787 | 0.0170 |
| NM_001938 | DR1           | Down-regulator of transcription 1, TBP-binding (negative<br>cofactor 2)             | -1.7316 | 0.0232 |
| NM_198256 | E2F6          | E2F transcription factor 6                                                          | -1.8898 | 0.0319 |
| NM_000125 | ESR1          | Estrogen receptor 1                                                                 | 1.1740  | 0.4189 |
| NM_005238 | ETS1          | V-ets erythroblastosis virus E26 oncogene homolog 1<br>(avian)                      | -1.0884 | 0.8081 |
| NM_005239 | ETS2          | V-Ets erythroblastosis virus E26 oncogene homolog 2<br>(avian)                      | -1.6075 | 0.0228 |
| NM_021784 | FOXA2         | Forkhead box A2                                                                     | -1.8502 | 0.0087 |
| NM_002015 | FOXO1         | Forkhead box O1                                                                     | -1.8441 | 0.0477 |
| NM_002049 | GATA1         | GATA binding protein 1 (globin transcription factor 1)                              | 1.6764  | 0.0307 |
| NM_032638 | GATA2         | GATA binding protein 2                                                              | -1.8026 | 0.0031 |
| NM_002051 | GATA3         | GATA binding protein 3                                                              | -1.9174 | 0.0166 |
| NM_002096 | GTF2F1        | General transcription factor IIF, polypeptide 1, 74kDa                              | -1.9326 | 0.0017 |
| NM_004821 | HAND1         | Heart and neural crest derivatives expressed 1                                      | -1.7403 | 0.0085 |
| NM_004964 | HDAC1         | Histone deacetylase 1                                                               | -1.7900 | 0.0819 |
| NM_000545 | HNF1A         | HNF1 homeobox A                                                                     | 1.2515  | 0.1965 |
| NM_178849 | HNF4A         | Hepatocyte nuclear factor 4, alpha                                                  | -1.6570 | 0.0073 |

|           |         |                                                                           |         |        |
|-----------|---------|---------------------------------------------------------------------------|---------|--------|
| NM_005354 | JUND    | Jun D proto-oncogene                                                      | -1.9512 | 0.1116 |
| NM_002382 | MAX     | MYC associated factor X                                                   | -1.7829 | 0.0042 |
| NM_002478 | MYOD1   | Myogenic differentiation 1                                                | -1.6290 | 0.0312 |
| NM_006599 | NFAT5   | Nuclear factor of activated T-cells 5, tonicity-responsive                | -1.8754 | 0.0007 |
| NM_172390 | NFATC1  | Nuclear factor of activated T-cells, cytoplasmic, calcineurin-dependent 1 | 1.3599  | 0.0936 |
| NM_004555 | NFATC3  | Nuclear factor of activated T-cells, cytoplasmic, calcineurin-dependent 3 | -1.6252 | 0.1092 |
| NM_000176 | NR3C1   | Nuclear receptor subfamily 3, group C, member 1 (glucocorticoid receptor) | -1.8368 | 0.0173 |
| NM_000280 | PAX6    | Paired box 6                                                              | -1.8881 | 0.0652 |
| NM_006235 | POU2AF1 | POU class 2 associating factor 1                                          | -1.7587 | 0.0014 |
| NM_005036 | PPARA   | Peroxisome proliferator-activated receptor alpha                          | 1.4587  | 0.0449 |
| NM_015869 | PPARG   | Peroxisome proliferator-activated receptor gamma                          | -1.6290 | 0.0312 |
| NM_002908 | REL     | V-rel reticuloendotheliosis viral oncogene homolog (avian)                | -1.8824 | 0.0140 |
| NM_021975 | RELA    | V-rel reticuloendotheliosis viral oncogene homolog A (avian)              | -1.8681 | 0.0305 |
| NM_005359 | SMAD4   | SMAD family member 4                                                      | -1.7076 | 0.0102 |
| NM_003111 | SP3     | Sp3 transcription factor                                                  | -1.8447 | 0.0854 |
| NM_003151 | STAT4   | Signal transducer and activator of transcription 4                        | -1.6290 | 0.0312 |
| NM_003152 | STAT5A  | Signal transducer and activator of transcription 5A                       | -1.5164 | 0.0373 |
| NM_012448 | STAT5B  | Signal transducer and activator of transcription 5B                       | -1.6031 | 0.0497 |
| NM_003194 | TBP     | TATA box binding protein                                                  | -1.6853 | 0.0054 |
| NM_003244 | TGIF1   | TGFB-induced factor homeobox 1                                            | -1.5346 | 0.0184 |

**Supplementary Table 2.** Changes in cytokine/chemokine expression by PCR array in JFH1 HCV infected huh7.5.1 cells with SYK siRNA or negative siRNA control.

| GenBank   | Gene Symbol   | Description                                                                                               | Fold Change    | P-value       |
|-----------|---------------|-----------------------------------------------------------------------------------------------------------|----------------|---------------|
| NM_001565 | <b>CXCL10</b> | Chemokine (C-X-C motif) ligand 10                                                                         | <b>-3.8220</b> | <b>0.0000</b> |
| NM_000584 | <b>IL8</b>    | Interleukin 8                                                                                             | <b>-3.6621</b> | <b>0.0000</b> |
| NM_001511 | <b>CXCL1</b>  | Chemokine (C-X-C motif) ligand 1 (melanoma growth stimulating activity, alpha)                            | <b>-3.2989</b> | <b>0.0000</b> |
| NM_002089 | <b>CXCL2</b>  | Chemokine (C-X-C motif) ligand 2                                                                          | <b>-2.8740</b> | <b>0.0001</b> |
| NM_000590 | <b>IL9</b>    | Interleukin 9                                                                                             | <b>-2.7149</b> | <b>0.0004</b> |
| NM_001562 | <b>IL18</b>   | Interleukin 18 (interferon-gamma-inducing factor)                                                         | <b>-2.4576</b> | <b>0.0000</b> |
| NM_004591 | <b>CCL20</b>  | Chemokine (C-C motif) ligand 20                                                                           | <b>-2.4198</b> | <b>0.0000</b> |
| NM_002187 | <b>IL12B</b>  | Interleukin 12B (natural killer cell stimulatory factor 2, cytotoxic lymphocyte maturation factor 2, p40) | <b>-2.3675</b> | <b>0.0791</b> |
| NM_002309 | <b>LIF</b>    | Leukemia inhibitory factor (cholinergic differentiation factor)                                           | <b>-2.0693</b> | <b>0.0001</b> |
| NM_000609 | <b>CXCL12</b> | Chemokine (C-X-C motif) ligand 12                                                                         | <b>2.4362</b>  | <b>0.0010</b> |
| NM_004797 | ADIPOQ        | Adiponectin, C1Q and collagen domain containing                                                           | -1.1859        | 0.2150        |
| NM_001200 | BMP2          | Bone morphogenetic protein 2                                                                              | 1.1719         | 0.0123        |
| NM_130851 | BMP4          | Bone morphogenetic protein 4                                                                              | 1.0195         | 0.7683        |
| NM_001718 | BMP6          | Bone morphogenetic protein 6                                                                              | -1.5805        | 0.1801        |
| NM_001719 | BMP7          | Bone morphogenetic protein 7                                                                              | -1.3816        | 0.2797        |
| NM_001735 | C5            | Complement component 5                                                                                    | -1.8101        | 0.0000        |
| NM_002981 | CCL1          | Chemokine (C-C motif) ligand 1                                                                            | -1.0439        | 0.4821        |
| NM_002986 | CCL11         | Chemokine (C-C motif) ligand 11                                                                           | -1.2178        | 0.0042        |
| NM_005408 | CCL13         | Chemokine (C-C motif) ligand 13                                                                           | 1.0583         | 0.6063        |
| NM_002987 | CCL17         | Chemokine (C-C motif) ligand 17                                                                           | -1.0949        | 0.5495        |
| NM_002988 | CCL18         | Chemokine (C-C motif) ligand 18 (pulmonary and activation-regulated)                                      | -1.0179        | 0.7801        |
| NM_006274 | CCL19         | Chemokine (C-C motif) ligand 19                                                                           | -1.4616        | 0.1718        |
| NM_002982 | CCL2          | Chemokine (C-C motif) ligand 2                                                                            | -1.3542        | 0.3187        |
| NM_002989 | CCL21         | Chemokine (C-C motif) ligand 21                                                                           | -1.1764        | 0.1950        |
| NM_002990 | CCL22         | Chemokine (C-C motif) ligand 22                                                                           | -1.3542        | 0.3187        |
| NM_002991 | CCL24         | Chemokine (C-C motif) ligand 24                                                                           | -1.3542        | 0.3187        |
| NM_002983 | CCL3          | Chemokine (C-C motif) ligand 3                                                                            | -1.2105        | 0.4100        |
| NM_002985 | CCL5          | Chemokine (C-C motif) ligand 5                                                                            | -1.4171        | 0.2300        |
| NM_006273 | CCL7          | Chemokine (C-C motif) ligand 7                                                                            | 1.0688         | 0.8347        |
| NM_005623 | CCL8          | Chemokine (C-C motif) ligand 8                                                                            | -1.0654        | 0.5658        |

|           |        |                                                                                                           |         |        |
|-----------|--------|-----------------------------------------------------------------------------------------------------------|---------|--------|
| NM_000074 | CD40LG | CD40 ligand                                                                                               | -1.3821 | 0.0404 |
| NM_000614 | CNTF   | Ciliary neurotrophic factor                                                                               | 1.3118  | 0.0157 |
| NM_000757 | CSF1   | Colony stimulating factor 1 (macrophage)                                                                  | -1.0183 | 0.6174 |
| NM_000758 | CSF2   | Colony stimulating factor 2 (granulocyte-macrophage)                                                      | 1.2353  | 0.5315 |
| NM_000759 | CSF3   | Colony stimulating factor 3 (granulocyte)                                                                 | 1.4070  | 0.1917 |
| NM_002996 | CX3CL1 | Chemokine (C-X3-C motif) ligand 1                                                                         | -1.4456 | 0.2129 |
| NM_005409 | CXCL11 | Chemokine (C-X-C motif) ligand 11                                                                         | -1.4787 | 0.1628 |
| NM_006419 | CXCL13 | Chemokine (C-X-C motif) ligand 13                                                                         | -1.3542 | 0.3187 |
| NM_022059 | CXCL16 | Chemokine (C-X-C motif) ligand 16                                                                         | -1.5462 | 0.0002 |
| NM_002994 | CXCL5  | Chemokine (C-X-C motif) ligand 5                                                                          | -1.6546 | 0.0000 |
| NM_002416 | CXCL9  | Chemokine (C-X-C motif) ligand 9                                                                          | -1.2096 | 0.0024 |
| NM_000639 | FASLG  | Fas ligand (TNF superfamily, member 6)                                                                    | -1.1485 | 0.1242 |
| NM_000175 | GPI    | Glucose-6-phosphate isomerase                                                                             | -1.1164 | 0.0384 |
| NM_000605 | IFNA2  | Interferon, alpha 2                                                                                       | -1.3542 | 0.3187 |
| NM_000619 | IFNG   | Interferon, gamma                                                                                         | -1.2454 | 0.3536 |
| NM_000572 | IL10   | Interleukin 10                                                                                            | -1.6041 | 0.0502 |
| NM_000641 | IL11   | Interleukin 11                                                                                            | 1.2842  | 0.0459 |
| NM_000882 | IL12A  | Interleukin 12A (natural killer cell stimulatory factor 1, cytotoxic lymphocyte maturation factor 1, p35) | 1.4720  | 0.0002 |
| NM_002188 | IL13   | Interleukin 13                                                                                            | -1.0330 | 0.6954 |
| NM_000585 | IL15   | Interleukin 15                                                                                            | -1.1239 | 0.0704 |
| NM_004513 | IL16   | Interleukin 16                                                                                            | -1.3305 | 0.0022 |
| NM_002190 | IL17A  | Interleukin 17A                                                                                           | -1.4574 | 0.0039 |
| NM_052872 | IL17F  | Interleukin 17F                                                                                           | -1.0234 | 0.7975 |
| NM_000575 | IL1A   | Interleukin 1, alpha                                                                                      | -1.1124 | 0.3913 |
| NM_000576 | IL1B   | Interleukin 1, beta                                                                                       | -1.2593 | 0.2841 |
| NM_000577 | IL1RN  | Interleukin 1 receptor antagonist                                                                         | -1.7398 | 0.0006 |
| NM_000586 | IL2    | Interleukin 2                                                                                             | -1.3542 | 0.3187 |
| NM_021803 | IL21   | Interleukin 21                                                                                            | -1.2803 | 0.3384 |
| NM_020525 | IL22   | Interleukin 22                                                                                            | -1.2809 | 0.0074 |
| NM_016584 | IL23A  | Interleukin 23, alpha subunit p19                                                                         | 1.1784  | 0.0096 |
| NM_006850 | IL24   | Interleukin 24                                                                                            | -1.1700 | 0.0617 |
| NM_145659 | IL27   | Interleukin 27                                                                                            | -1.3442 | 0.0019 |
| NM_000588 | IL3    | Interleukin 3 (colony-stimulating factor, multiple)                                                       | -1.6732 | 0.0064 |
| NM_000589 | IL4    | Interleukin 4                                                                                             | -1.3542 | 0.3187 |

|           |           |                                                                          |         |        |
|-----------|-----------|--------------------------------------------------------------------------|---------|--------|
| NM_000879 | IL5       | Interleukin 5 (colony-stimulating factor, eosinophil)                    | 1.0699  | 0.7299 |
| NM_000600 | IL6       | Interleukin 6 (interferon, beta 2)                                       | -1.3287 | 0.0817 |
| NM_000880 | IL7       | Interleukin 7                                                            | -1.0620 | 0.5009 |
| NM_000595 | LTA       | Lymphotoxin alpha (TNF superfamily, member 1)                            | 1.0172  | 0.8792 |
| NM_002341 | LTB       | Lymphotoxin beta (TNF superfamily, member 3)                             | -1.7625 | 0.0103 |
| NM_002415 | MIF       | Macrophage migration inhibitory factor (glycosylation-inhibiting factor) | -1.0601 | 0.0511 |
| NM_005259 | MSTN      | Myostatin                                                                | -1.2518 | 0.0070 |
| NM_018055 | NODAL     | Nodal homolog (mouse)                                                    | -1.0405 | 0.1182 |
| NM_020530 | OSM       | Oncostatin M                                                             | -1.3542 | 0.3187 |
| NM_002704 | PPBP      | Pro-platelet basic protein (chemokine (C-X-C motif) ligand 7)            | -1.3542 | 0.3187 |
| NM_000582 | SPP1      | Secreted phosphoprotein 1                                                | -1.2001 | 0.1147 |
| NM_003238 | TGFB2     | Transforming growth factor, beta 2                                       | -1.0447 | 0.3585 |
| NM_000460 | THPO      | Thrombopoietin                                                           | 1.0482  | 0.0859 |
| NM_000594 | TNF       | Tumor necrosis factor                                                    | -1.3542 | 0.3187 |
| NM_002546 | TNFRSF11B | Tumor necrosis factor receptor superfamily, member 11b                   | -1.0159 | 0.6460 |
| NM_003810 | TNFSF10   | Tumor necrosis factor (ligand) superfamily, member 10                    | 1.7479  | 0.0002 |
| NM_003701 | TNFSF11   | Tumor necrosis factor (ligand) superfamily, member 11                    | -1.2391 | 0.0096 |
| NM_006573 | TNFSF13B  | Tumor necrosis factor (ligand) superfamily, member 13b                   | 1.0886  | 0.2512 |
| NM_003376 | VEGFA     | Vascular endothelial growth factor A                                     | -1.1215 | 0.0173 |
| NM_002995 | XCL1      | Chemokine (C motif) ligand 1                                             | -1.3180 | 0.0206 |

**Supplementary Table 3.** The hemodynamic effects of GS-9973 treatment on murine.

| Group (Rats / Mice)                                           |                              | Liver weight (g) | Spleen weight (g) | Body weight (g)  | Liver / Body weight (%) | Spleen / Body weight (%) | SBP (mmHg)      | DBP (mmHg)     | PVP (mmHg)    |
|---------------------------------------------------------------|------------------------------|------------------|-------------------|------------------|-------------------------|--------------------------|-----------------|----------------|---------------|
| <b>Rats (sham operation) treated with GS-9973 for 2 weeks</b> | Vehicle                      | 11.393 ± 0.970   | 0.733 ± 0.199     | 348.533 ± 20.913 | 3.275 ± 0.148           | 0.203 ± 0.044            | 112.630 ± 5.127 | 85.066 ± 5.351 | 7.584 ± 0.890 |
|                                                               | GS-9973 (2.5 mg/kg)          | 10.602 ± 1.451   | 0.625 ± 0.070     | 336.667 ± 15.150 | 3.147 ± 0.398           | 0.185 ± 0.012            | 113.140 ± 4.977 | 87.623 ± 5.584 | 8.166 ± 0.501 |
|                                                               | <i>P value</i> (vs. vehicle) | 0.476            | 0.331             | 0.420            | 0.598                   | 0.405                    | 0.883           | 0.503          | 0.249         |
|                                                               | GS-9973 (10 mg/kg)           | 11.089 ± 1.903   | 0.633 ± 0.072     | 338.067 ± 16.636 | 3.267 ± 0.450           | 0.187 ± 0.015            | 109.378 ± 6.020 | 85.803 ± 6.094 | 7.826 ± 1.182 |
|                                                               | <i>P value</i> (vs. vehicle) | 0.825            | 0.366             | 0.496            | 0.975                   | 0.451                    | 0.411           | 0.853          | 0.740         |
| <b>Rats treated with GS-9973 for 5 weeks</b>                  | Vehicle                      | 18.341 ± 2.965   | 1.338 ± 0.3288    | 534.250 ± 14.615 | 3.433 ± 0.556           | 0.255 ± 0.061            | 112.472 ± 4.362 | 85.607 ± 4.697 | 7.394 ± 0.831 |
|                                                               | GS-9973 (2.5 mg/kg)          | 19.546 ± 2.828   | 1.3108 ± 0.126    | 540.183 ± 20.745 | 3.622 ± 0.532           | 0.243 ± 0.031            | 112.130 ± 4.520 | 89.168 ± 3.162 | 7.658 ± 0.877 |
|                                                               | <i>P value</i> (vs. vehicle) | 0.526            | 0.871             | 0.612            | 0.596                   | 0.741                    | 0.911           | 0.209          | 0.657         |
|                                                               | GS-9973 (10 mg/kg)           | 17.419 ± 2.415   | 1.384 ± 0.217     | 521.817 ± 15.949 | 3.335 ± 0.430           | 0.266 ± 0.046            | 113.701 ± 7.640 | 86.950 ± 4.997 | 7.326 ± 0.971 |
|                                                               | <i>P value</i> (vs. vehicle) | 0.602            | 0.816             | 0.228            | 0.762                   | 0.770                    | 0.780           | 0.690          | 0.913         |
| <b>Mice treated with GS-9973 for 4 weeks</b>                  | Vehicle                      | 1.180 ± 0.064    | 0.072 ± 0.007     | 27.370 ± 0.238   | 4.312 ± 0.246           | 0.263 ± 0.028            | -               | -              | -             |
|                                                               | GS-9973 (5 mg/kg)            | 1.105 ± 0.071    | 0.068 ± 0.019     | 26.472 ± 0.926   | 4.170 ± 0.133           | 0.257 ± 0.078            | -               | -              | -             |
|                                                               | <i>P value</i> (vs. vehicle) | 0.188            | 0.685             | 0.109            | 0.390                   | 0.893                    | -               | -              | -             |
|                                                               | GS-9973 (20 mg/kg)           | 1.225 ± 0.0653   | 0.082 ± 0.016     | 27.155 ± 0.791   | 4.509 ± 0.158           | 0.302 ±                  | -               | -              | -             |
|                                                               | <i>P value</i> (vs. vehicle) | 0.392            | 0.298             | 0.627            | 0.260                   | 0.234                    | -               | -              | -             |

SBP, systolic blood pressure; DBP, diastolic blood pressure; PVP, portal venous pressure.

Data presented are means ± SD. A two-tailed, unpaired Student's t test was used to evaluate differences between GS-9973 treatment and vehicle control in each group.



**Supplementary Table 4.** Real-time polymerase chain reaction primers.

| Gene              | Accession number | Primer sequence (5' to 3')                                             | Predicted size (bp) |
|-------------------|------------------|------------------------------------------------------------------------|---------------------|
| <i>ACTA2</i>      | NM_001613        | Forward: CGTGGCTATTCCTTCGTTAC<br>Reverse: TGCCAGCAGACTCCATCC           | 235                 |
| <i>CBP</i>        | NM_004380        | Forward: GCCATCTCTCCAGCACACGACAC<br>Reverse: ACAGGCGTCGGCTGTTGCTGC     | 258                 |
| <i>CCL20</i>      | NM_004591        | Forward: GATGTCAGTGCTGCTACTC<br>Reverse: ATGTCACAGCCTTCATTGGC          | 141                 |
| <i>CCND1</i>      | NM_053056        | Forward: GCGAGGAACAGAAGTGC<br>Reverse: GAGTTGTCGGTGTAGATGC             | 190                 |
| <i>COL1A1</i>     | NM_000088        | Forward: CAGCCGCTTACCTACAGC<br>Reverse: TCAATCACTGTCTTGCCCCA           | 75                  |
| <i>CTGF</i>       | NM_001901        | Forward: AATGCTGCGAGGAGTGGGT<br>Reverse: CGGCTCTAATCATAGTTGGGTCT       | 117                 |
| <i>CXCL1</i>      | NM_001511        | Forward: AACCGAAGTCATAGCCACAC<br>Reverse: CCTCCCTTCTGGTCAGTTG          | 124                 |
| <i>CXCL2</i>      | NM_002089        | Forward: AACCGAAGTCATAGCCACAC<br>Reverse: CTTCTGGTCAGTTGGATTGTC        | 119                 |
| <i>CXCL10</i>     | NM_001565        | Forward: GTGGCATTCAAGGAGTACCTC<br>Reverse: GCCTTCGATTCTGGATTGAG        | 193                 |
| <i>CXCL12</i>     | NM_002089        | Forward: TCAGCCTGAGCTACAGATGC<br>Reverse: CTTTAGCTTCGGGTCAATGC         | 161                 |
| <i>GAPDH</i>      | NM_001256799     | Forward: ATGACCCCTTCATTGACC<br>Reverse: GAAGATGGTGATGGGATTTTC          | 131                 |
| <i>HCV (JFH1)</i> | AB047639         | Forward: TCTGCGGAACCGGTGAGTA<br>Reverse: TCAGGCAGTACCACAAGGC           | 150                 |
| <i>HBV</i>        | HW610289         | Forward: TATGTTGCCCGTGTCCCTC<br>Reverse: CCGTCCGAAGGTTTGGTACA          | 156                 |
| <i>IL8</i>        | NM_000584        | Forward: GGCACAACTTTCAGAGACAGCAG<br>Reverse: GTTTCTTCCTGGCTCTTGTCCCTAG | 61                  |
| <i>IL9</i>        | NM_000590        | Forward: CCAGCTTCCAAGTGCCACTGC<br>Reverse: TGCATGGTGGTATTGGTCATCTG     | 125                 |
| <i>IL12B</i>      | NM_002187        | Forward: GCCACGGTCATCTGCCGCAA<br>Reverse: GGGCACAGATGCCCATTCGCT        | 93                  |
| <i>IL18</i>       | NM_001562        | Forward: CAGCCGCTTTAGCAGCCA<br>Reverse: CAAGGAATTGTCTCCAGTGC           | 64                  |
| <i>LIF</i>        | NM_002309        | Forward: CCAACGTGACGGACTTCCC<br>Reverse: TACACGACTATGCGGTACAGC         | 82                  |
| <i>MYB</i>        | NM_005375        | Forward: CACTCCACTCCATCTCTGCCA<br>Reverse: GGACGATCATGCACCTTGCT        | 79                  |
| <i>MYC</i>        | NM_002467        | Forward: ACACCCTTCTCCCTTCG<br>Reverse: CCGCTCCACATACAGTCC              | 179                 |

|                                    |                        |                                                                     |     |
|------------------------------------|------------------------|---------------------------------------------------------------------|-----|
| <i>PAI-1</i>                       | NM_000602              | Forward: AGTGGACTTTTCAGAGGTGGA<br>Reverse: GCCGTTGAAGTAGAGGGCATT    | 109 |
| <i>PDGFR<math>\beta</math></i>     | NM_002609              | Forward: GCCCTTATGTCGGAGCTGAAGA<br>Reverse: GTTGCGGTGCAGGTAGTCCA    | 150 |
| <i>SYK(Total)</i>                  |                        | Forward: CGAGGGAAAGAAGTTCGACACG<br>Reverse: GGAACCTGGAAGTTGTGGAC    | 151 |
| <i>SYK(L)</i>                      | NM_003177              | Forward: CGAGGGAAAGAAGTTCGACACG<br>Reverse: CCAGGCTTTGGGAAGGAGTATG  | 219 |
| <i>SYK(S)</i>                      | NM_001135052           | Forward: CGAGGGAAAGAAGTTCGACACG<br>Reverse: GCAGGGGAGGACGCAGGATG    | 171 |
| <i>TGF-<math>\beta</math>1</i>     | NM_000660              | Forward: GGCCAGATCCTGTCCAAGC<br>Reverse: GTGGGTTTCCACCATTAGCAC      | 201 |
| <i>TIMP1</i>                       | NM_003254              | Forward: TGTTGTTGCTGTGGCTGATAGC<br>Reverse: TCTGGTGTCCCCACGAACTT    | 118 |
| mouse <i>Acta2</i>                 | NM_007392              | Forward: TCCCTGGAGAAGAGCTACGAACT<br>Reverse: AAGCGTTTCGTTTCCAATGGT  | 62  |
| mouse <i>Pdgfrb</i>                | NM_001146268           | Forward: AGCCAGAAGTAGCGAGAAGC<br>Reverse: GGCAGTATTCCGTGATGATG      | 137 |
| mouse <i>Syk(Total)</i>            |                        | Forward: AACGTGCTTCTGGTCACACA<br>Reverse: AGAACGCTTCCCACATCAGG      | 205 |
| mouse <i>Syk(L)</i>                | NM_011518              | Forward: CGGTACCATGCCAAAAGATTG<br>Reverse: GCTTTTTGTGGCCAGGCTT      | 135 |
| mouse <i>Syk(S)</i>                | XM_006516897           | Forward: CACTACCGCATTGACAGGGAC<br>Reverse: GGGGCAGGCACGGGAT         | 164 |
| mouse <i>Gapdh</i>                 | NM_008084              | Forward: TGCCCCATGTTTGTGATG<br>Reverse: TGTGGTCATGAGCCCTTCC         | 151 |
| rat <i>ACTA2</i>                   | NM_031004              | Forward: TGTGCTGGACTCTGGAGATG<br>Reverse: GAAGGAATAGCCACGCTCAG      | 148 |
| rat <i>PDGFR<math>\beta</math></i> | NM_031525              | Forward: TGTGCAGCCTAATGAGACT<br>Reverse: AGGAGATGGTGAAGAAGTG        | 146 |
| rat <i>SYK(Total)</i>              |                        | Forward: GAGGAACGTGCTTCTGGTCACC<br>Reverse: AGAACGCTTCCCACATCAGGACT | 209 |
| rat <i>SYK(L)</i>                  | ENSRNOT000000<br>16942 | Forward: CCTCTGGCAGCTAGTGGAAC<br>Reverse: GCTTTTTGTGGCCAGGCTTT      | 194 |
| rat <i>SYK(S)</i>                  | ENSRNOT000000<br>41726 | Forward: ACACCCTCTGGCAGCTAGTGGAAC<br>Reverse: GTGGGGGAGGCACAGGATGGG | 138 |
| rat <i>GAPDH</i>                   | NM_017008              | Forward: TGCCACTCAGAAGACTGTGG<br>Reverse: TTCAGCTCTGGGATGACCTT      | 129 |

---
